# Supplementary material for: A new toolkit for gene tagging in Candida albicans containing recyclable markers
Source: PubMed Central journal article supplement (PMC6622542; doi:10.1371/journal.pone.0219715), 2019-07-11
Supplement: pone.0219715.s001.pdf [file pone.0219715.s001.pdf]

**Figure A. Restriction maps of the toolkit plasmids.** Maps and nomenclature of modules cloned into the pFA vector background. *LAL*, *LHL*, *LUL*, *URA3-Clox* and *NAT1-Clox* were used as marker genes. The *GFP $\gamma$* , *3xGFP $\gamma$*  and *yEmCherry* served as fluorescent protein-encoding ORFs. HA, myc and TAP tags are also shown. The annealing sites of the oligonucleotides used for cassette amplification are indicated in blue. Only unique restriction sites are show.

Figure A

pFA-Clox plasmids (Deletion plasmids)

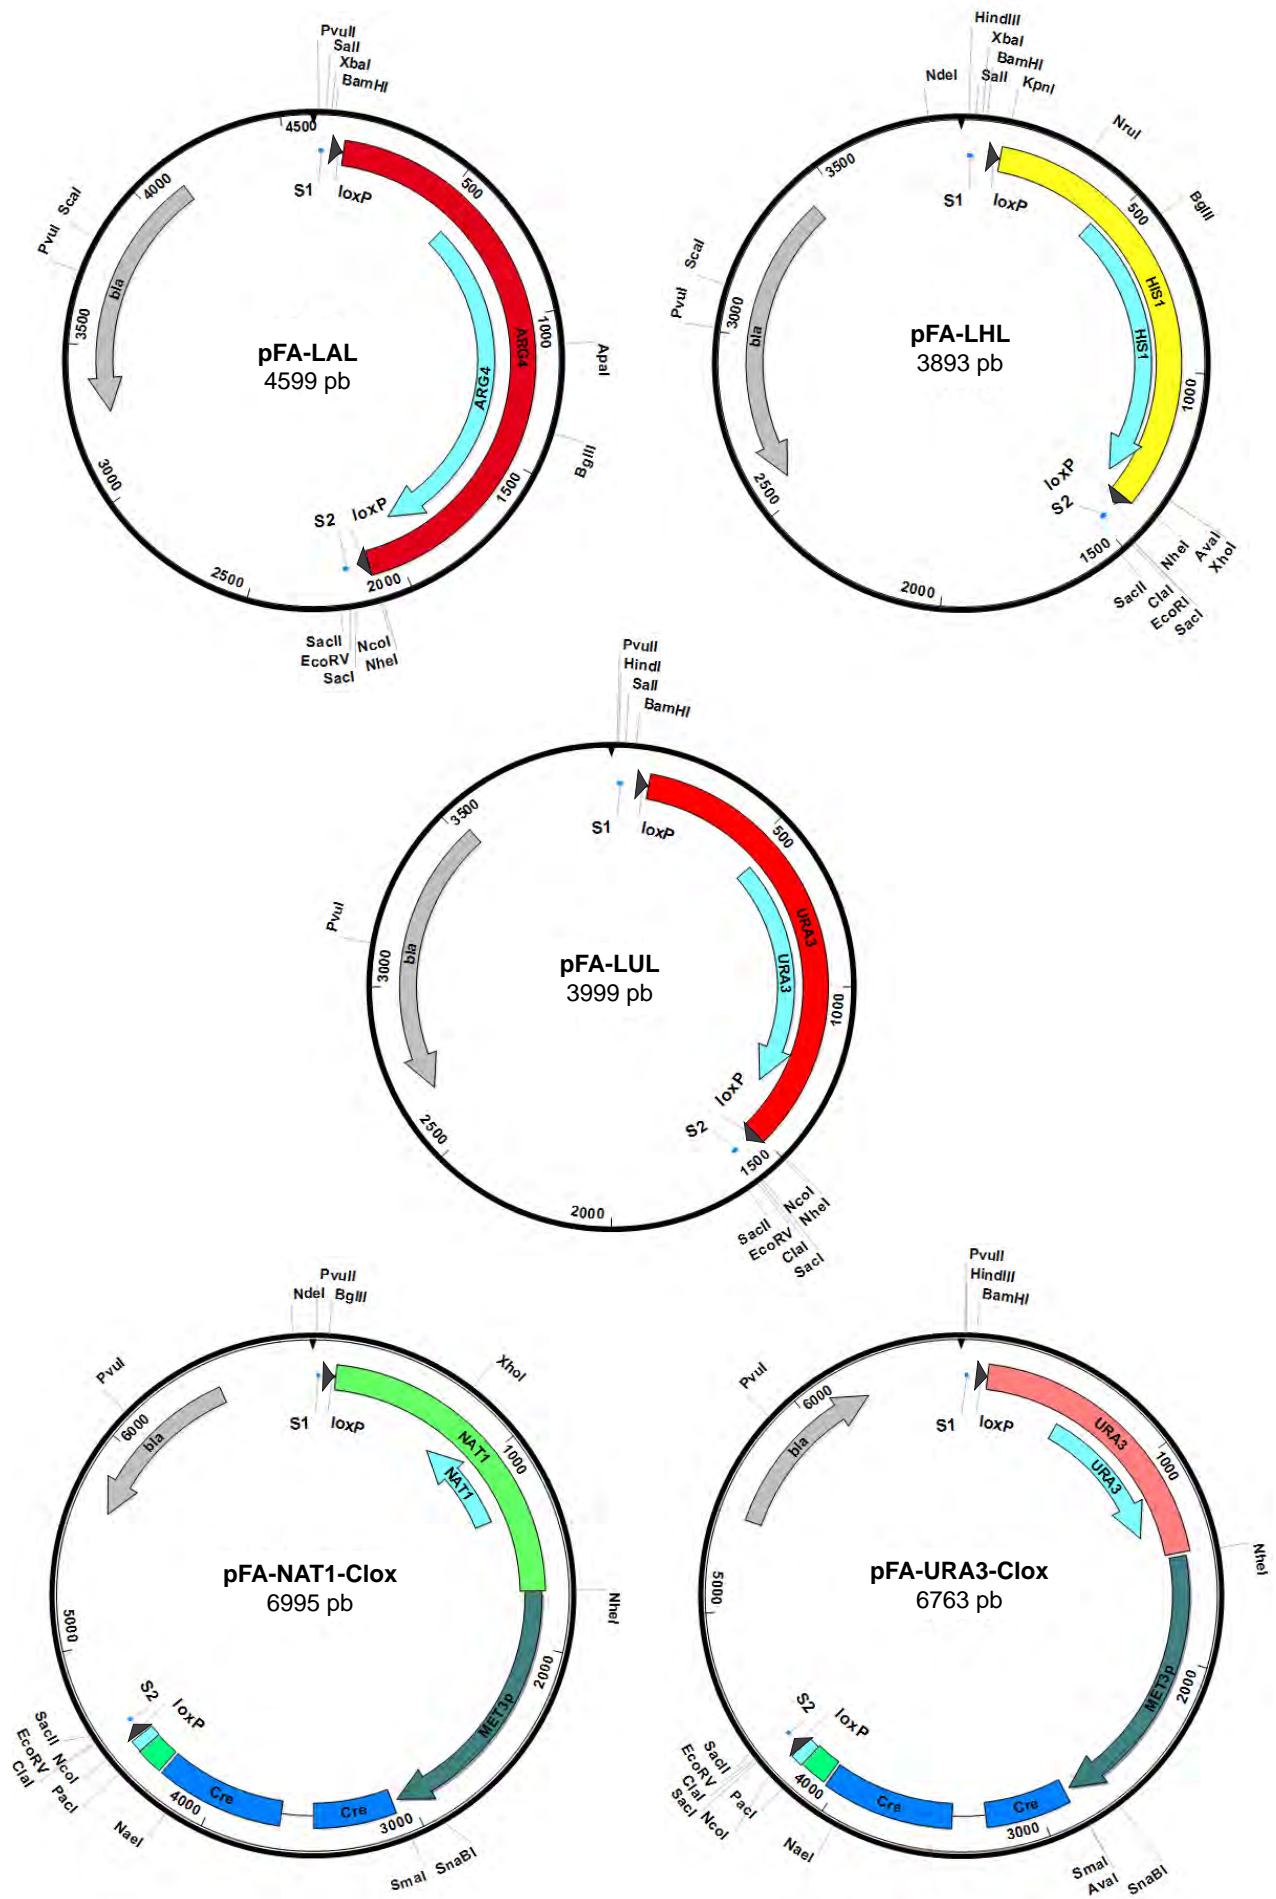

**Figure A (continued)**  
**pFA-GFP $\gamma$ -Clox plasmids**

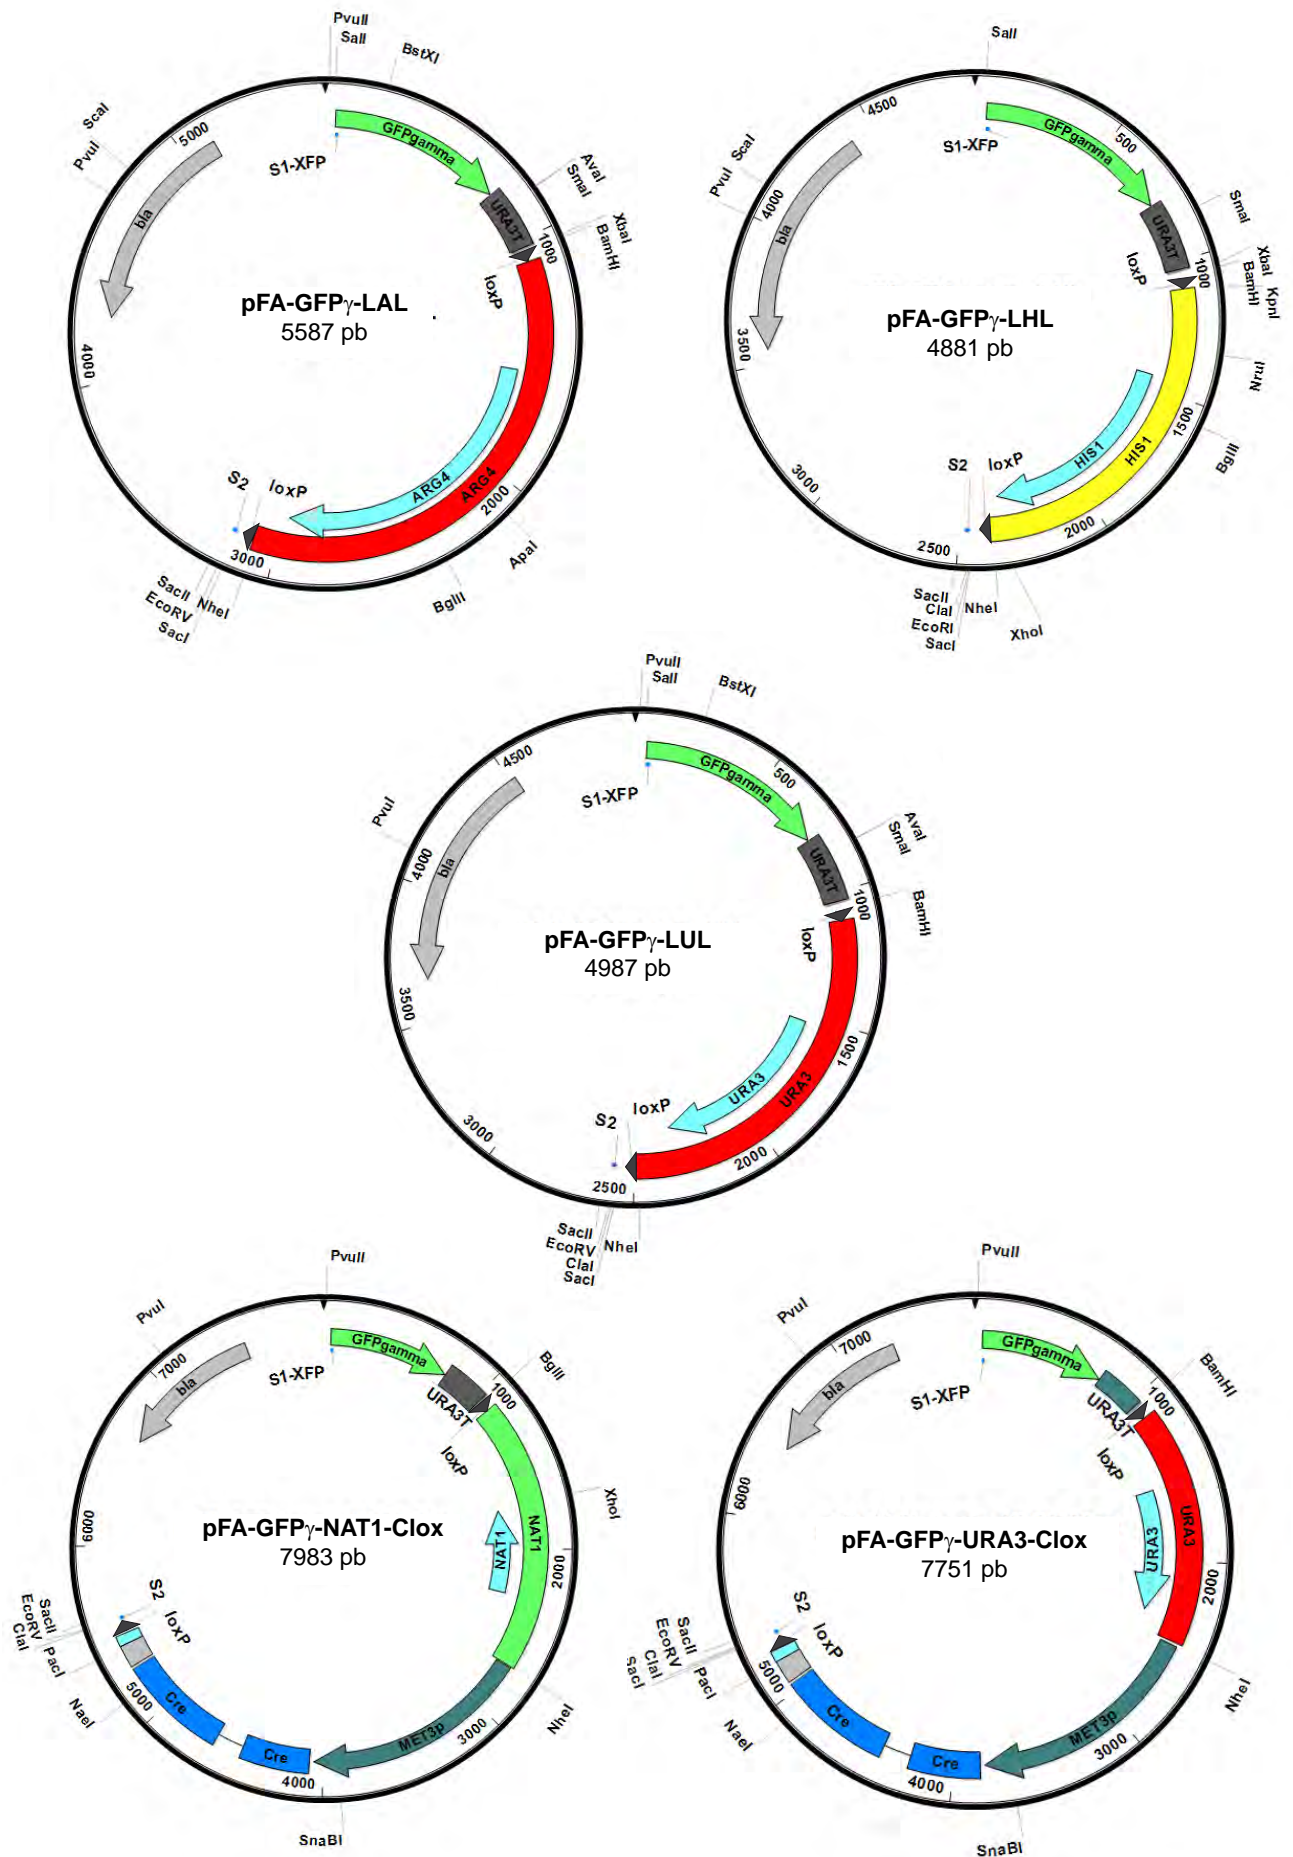

**Figure A (continued)**  
**pFA-3xGFP $\gamma$ -Clox plasmids**

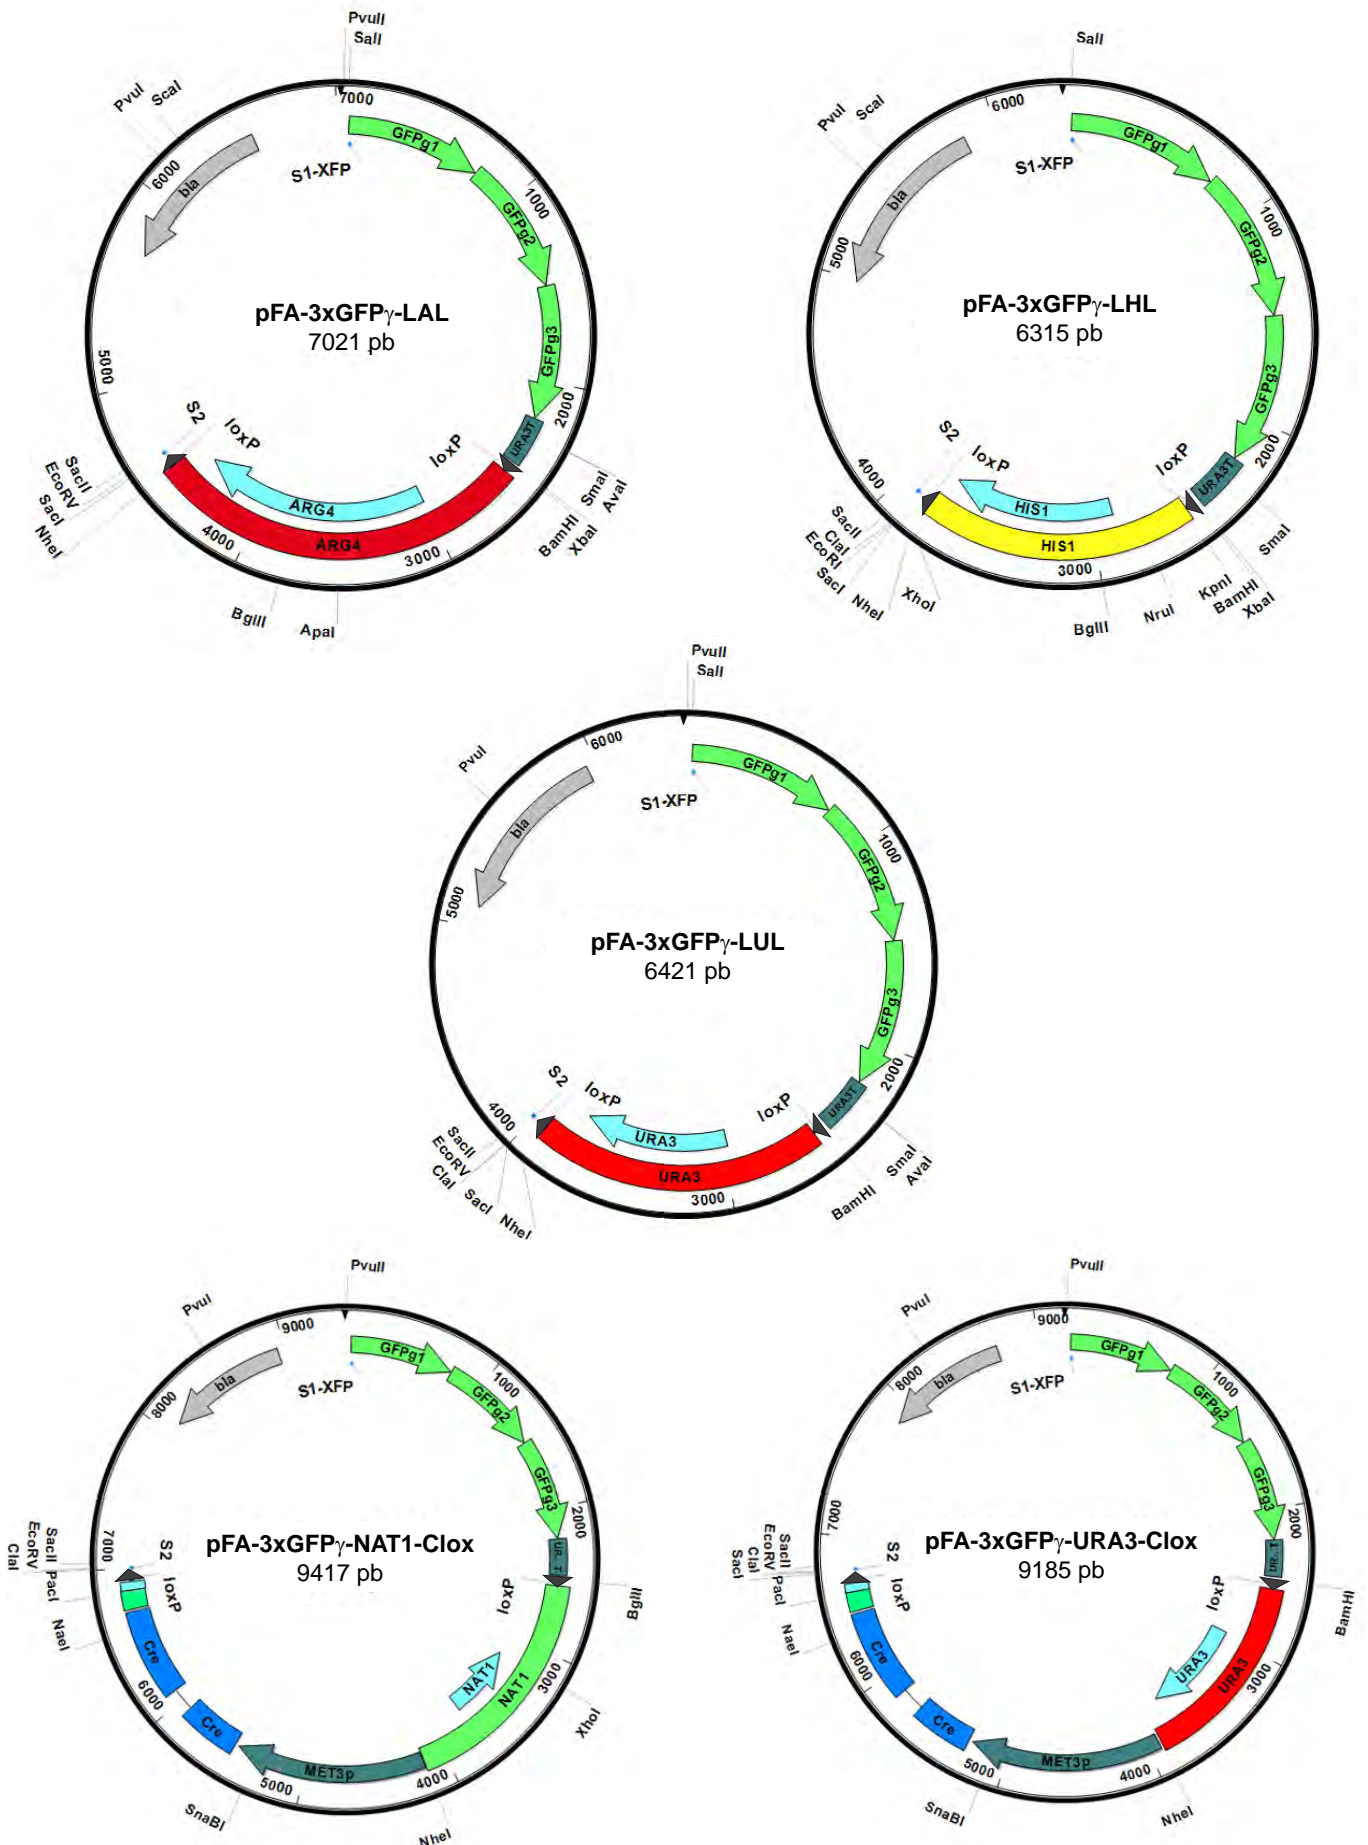

# Figure A (continued)

## pFA-yEmCherry-XXX plasmids

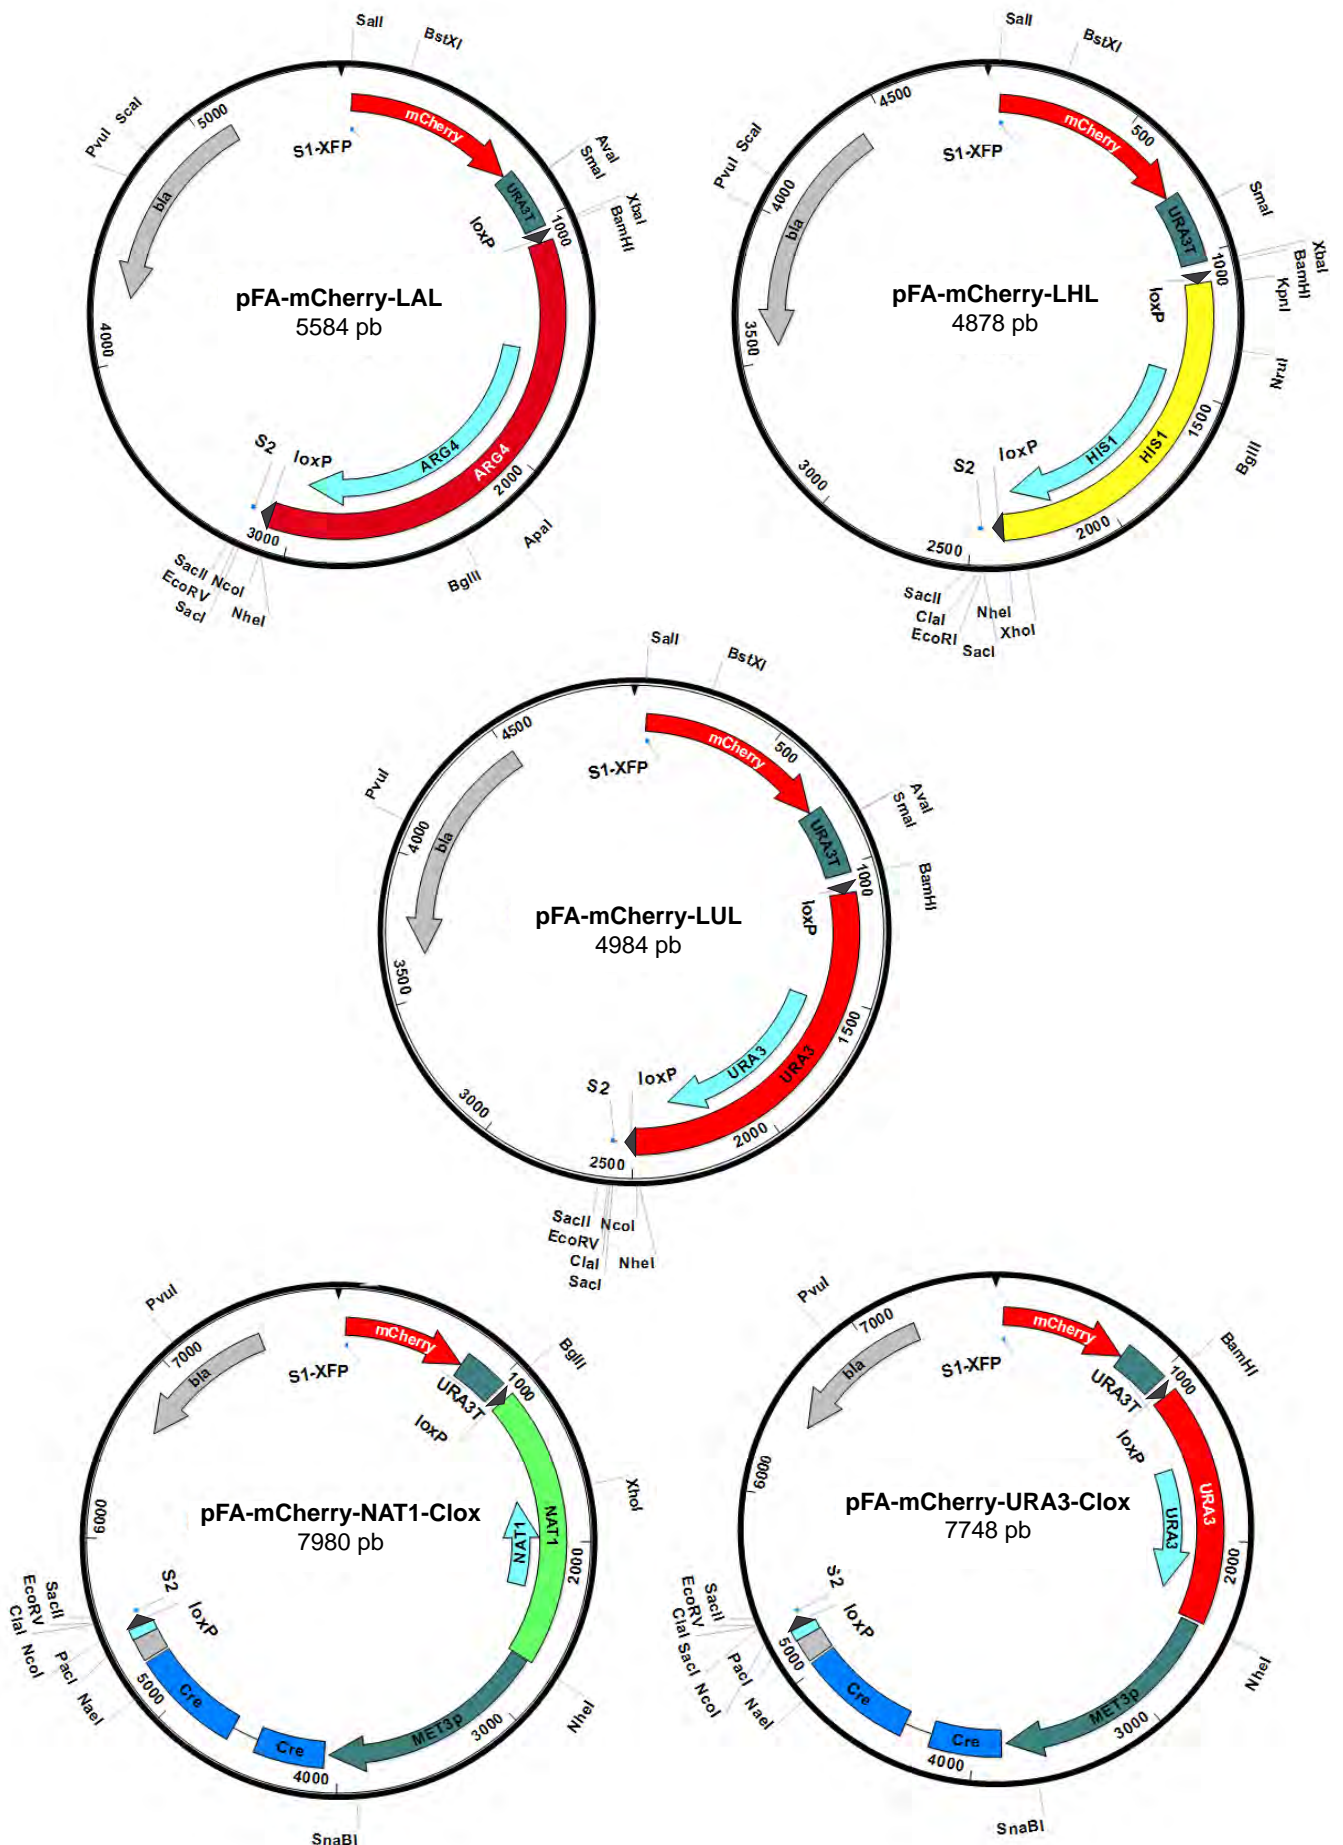

**Figure A (continued)**  
**pFA-HA-Clox plasmids**

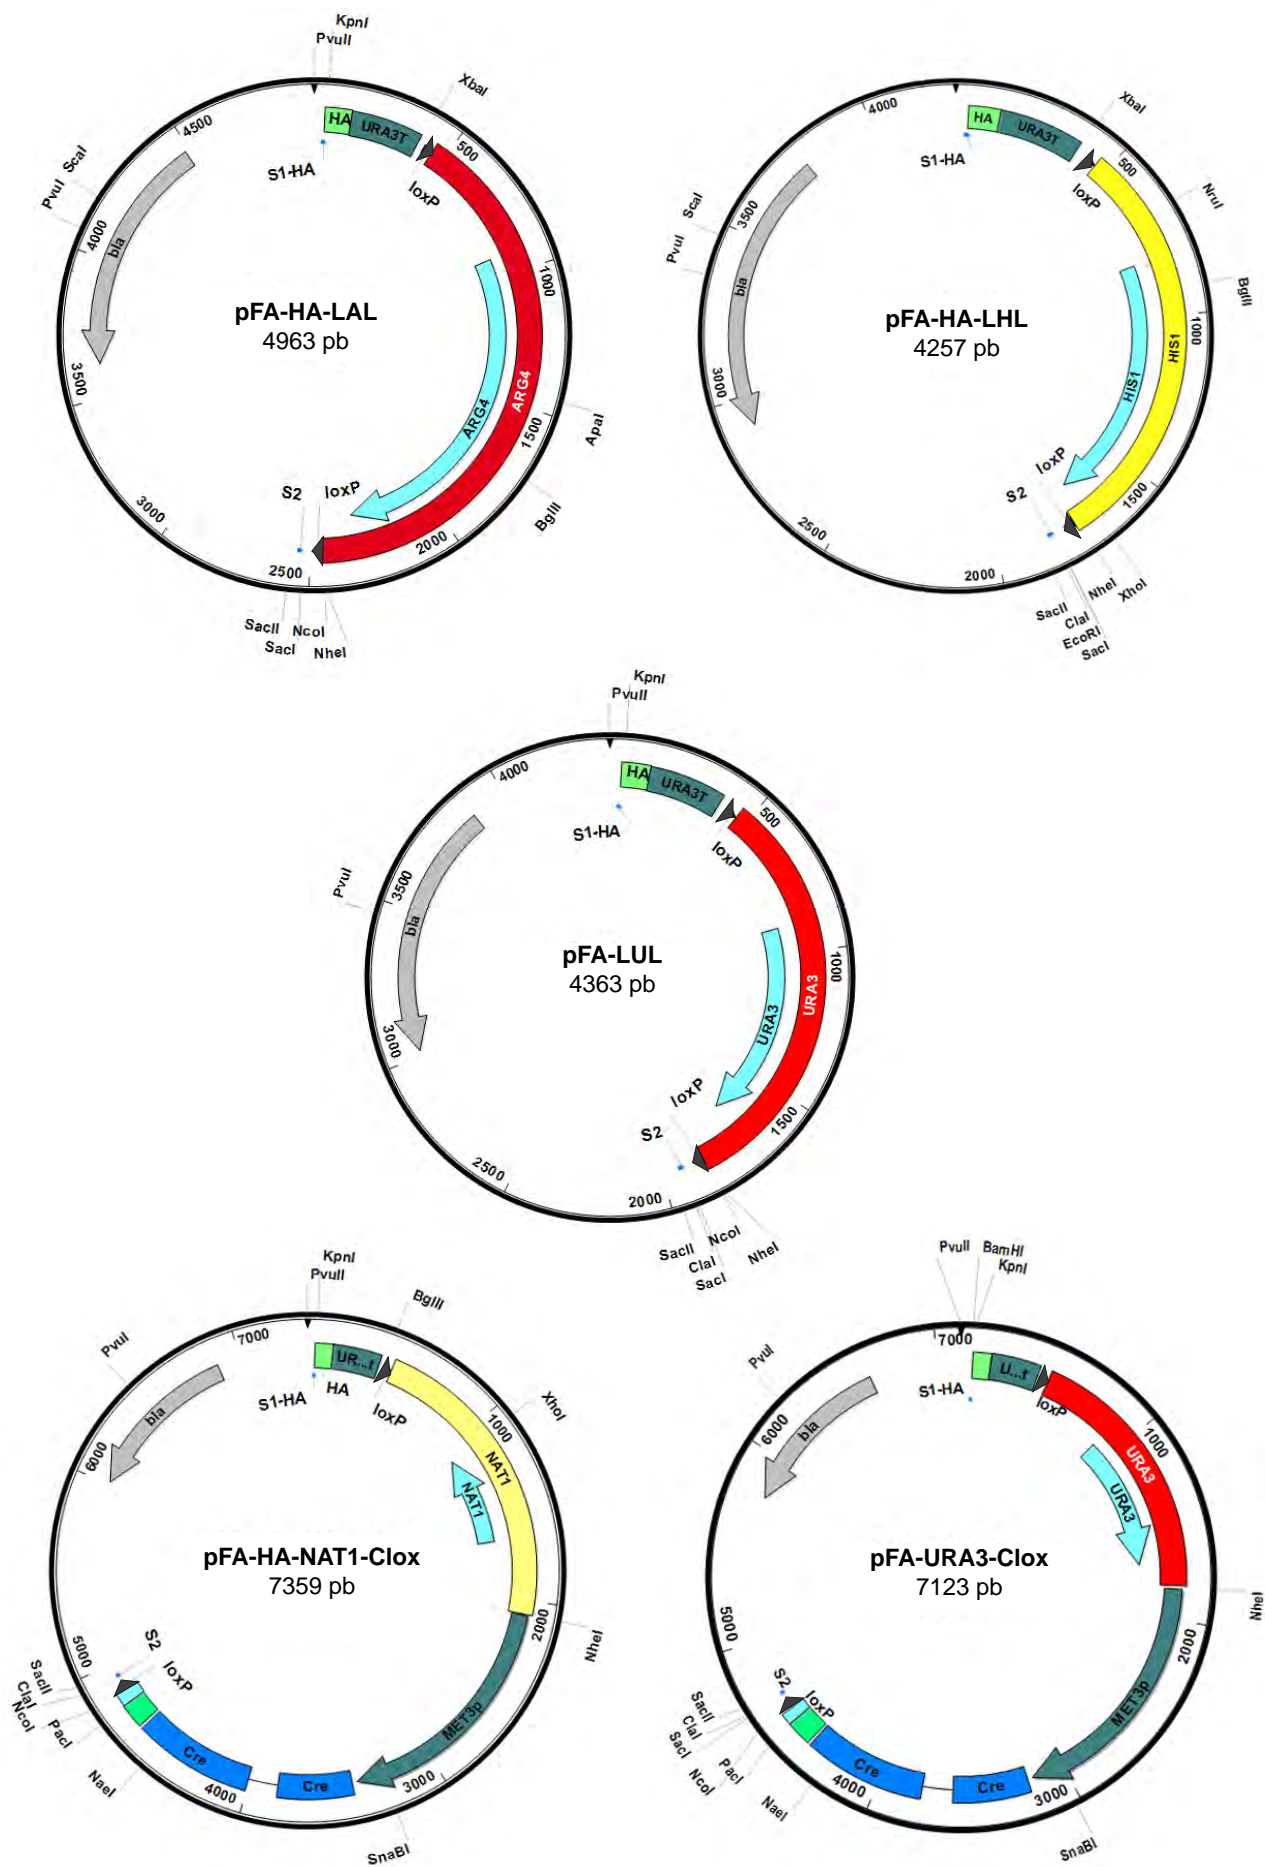

**Figure A (continued)**  
**pFA-myc-Clox plasmids**

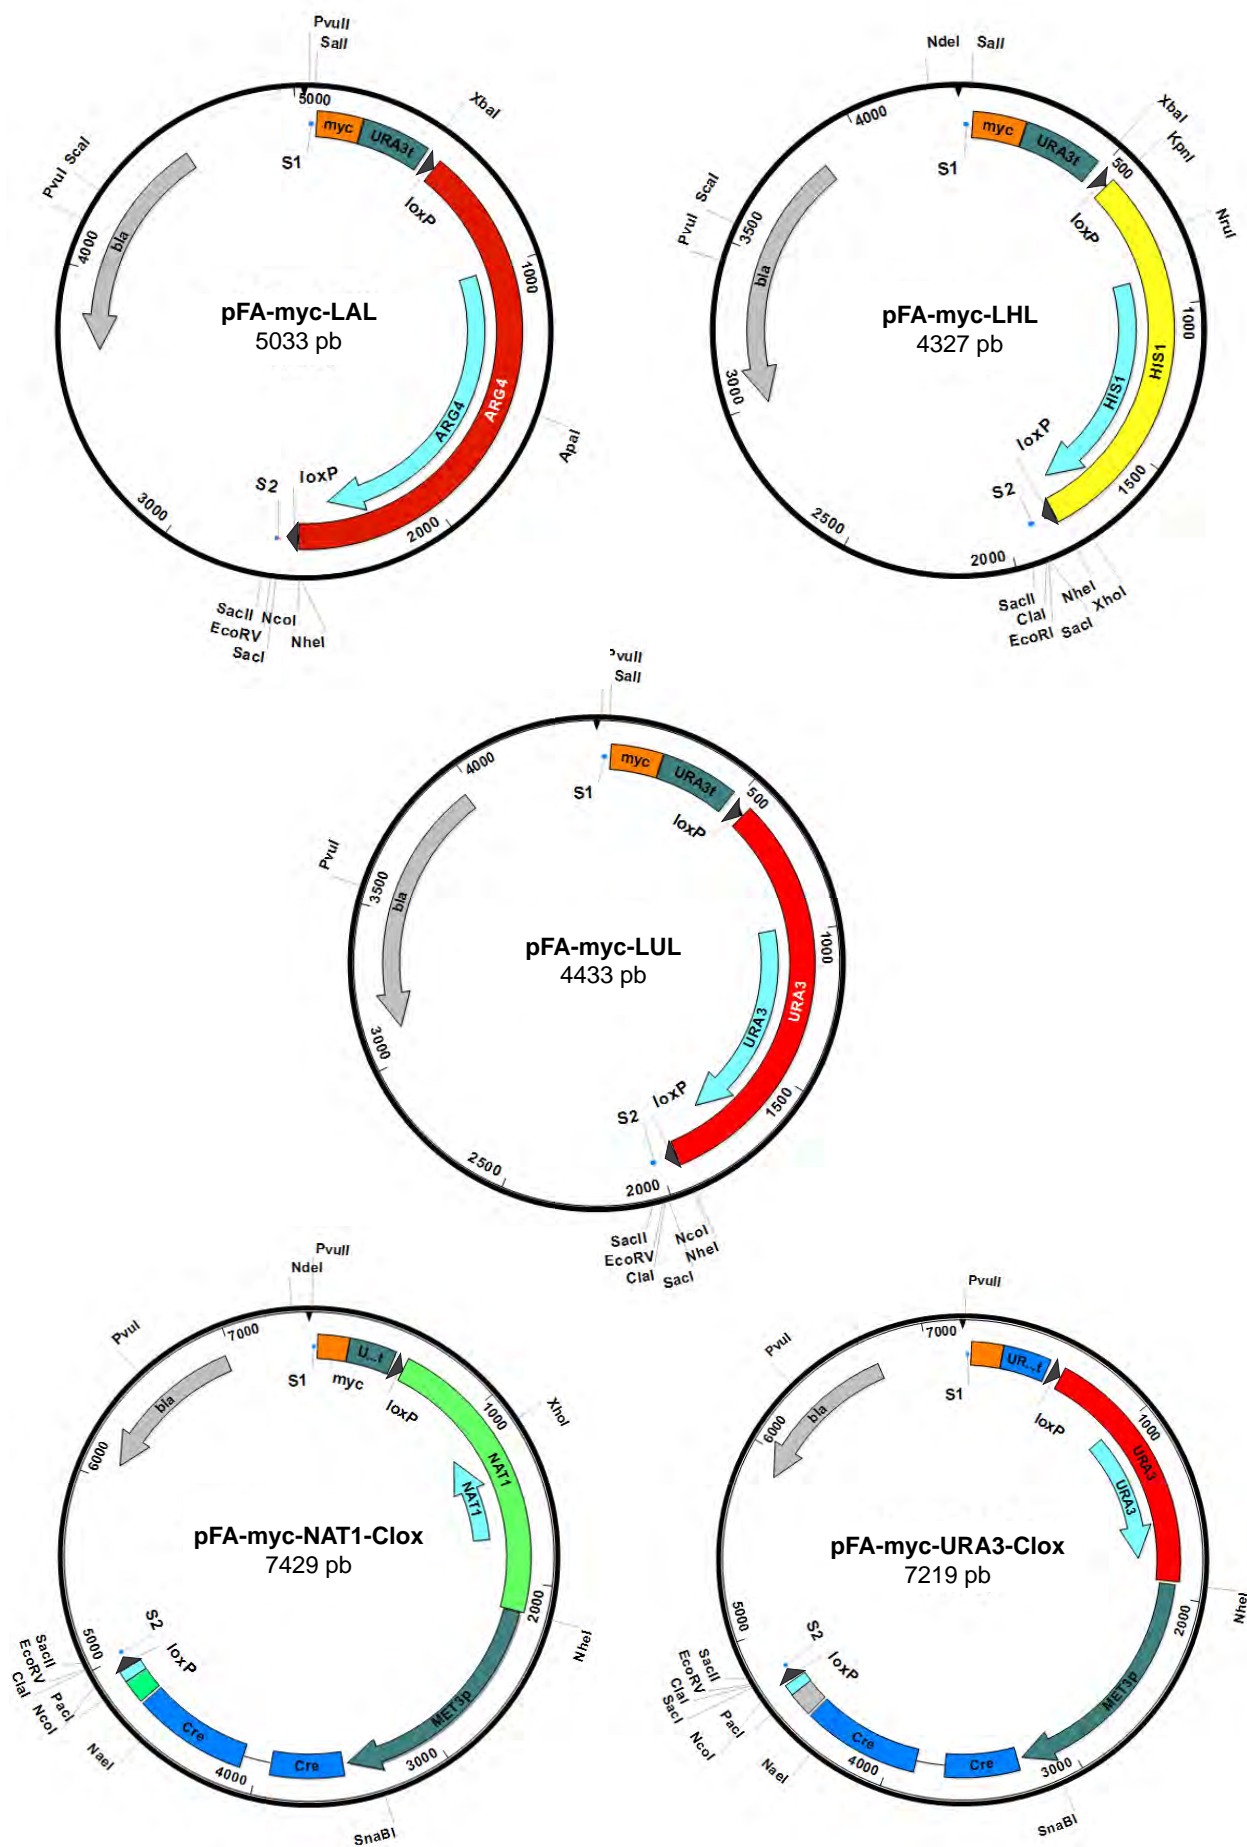

**Figure A (continued)**  
**pFA-TAP-Clox plasmids**

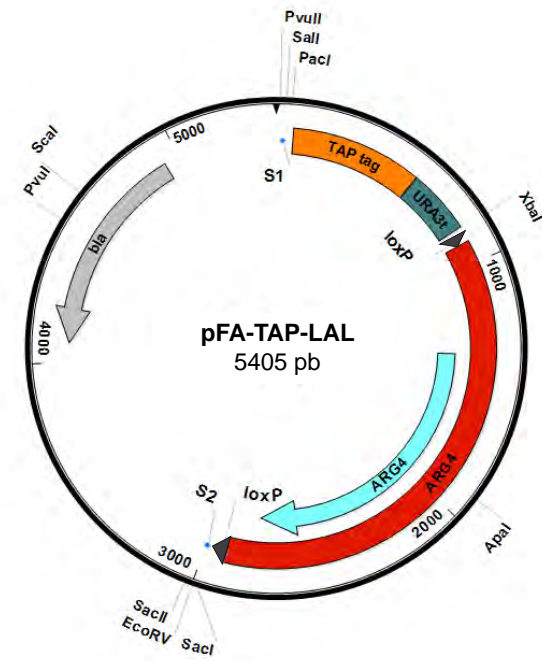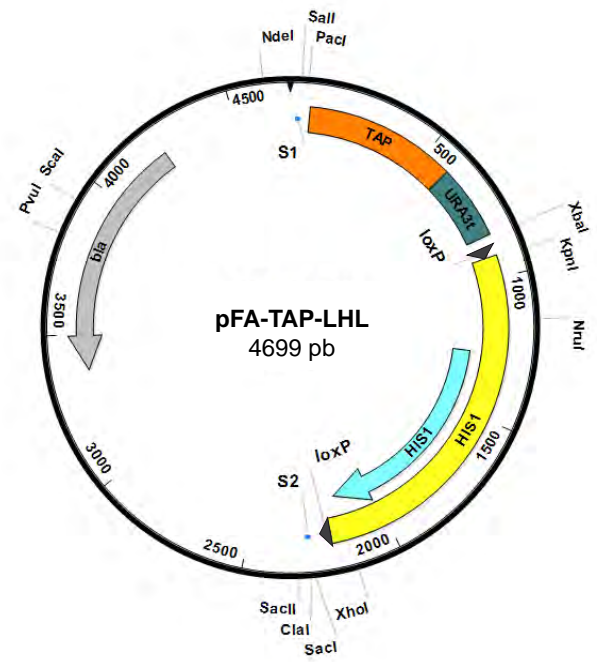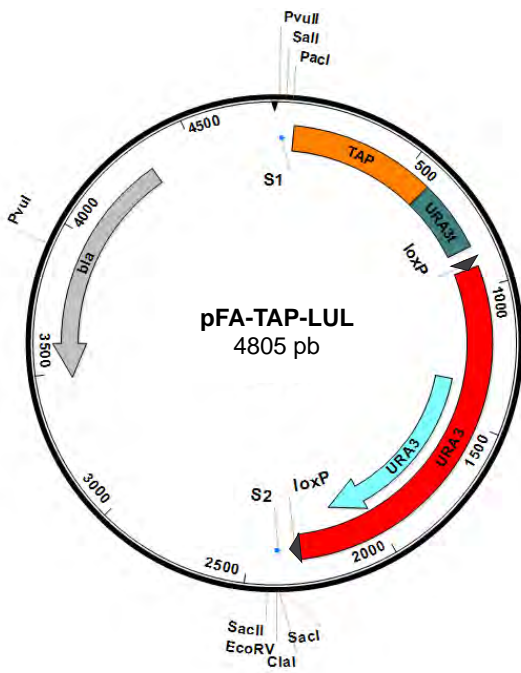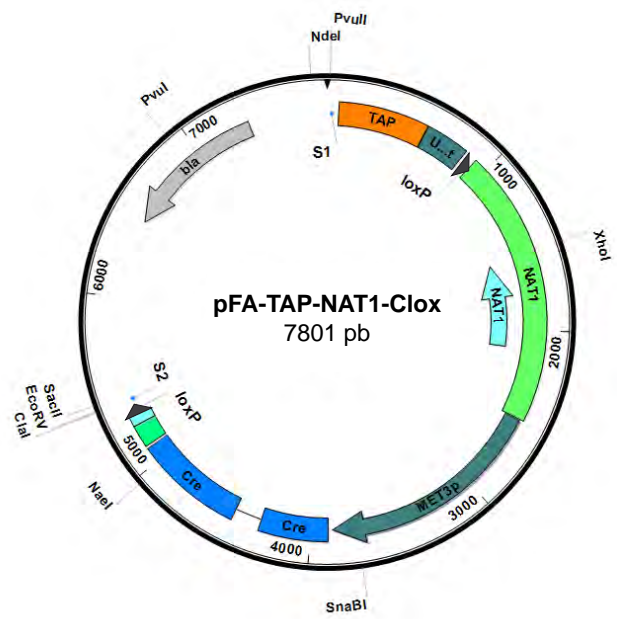



**Figure A (continued)**  
**pDIS-Clox plasmids**

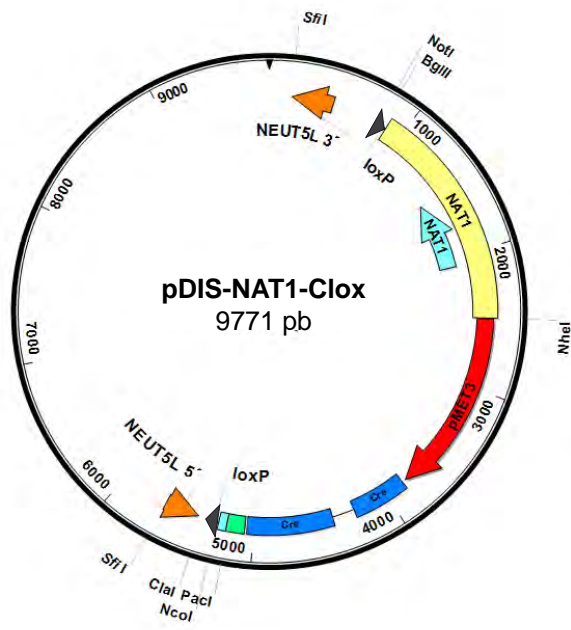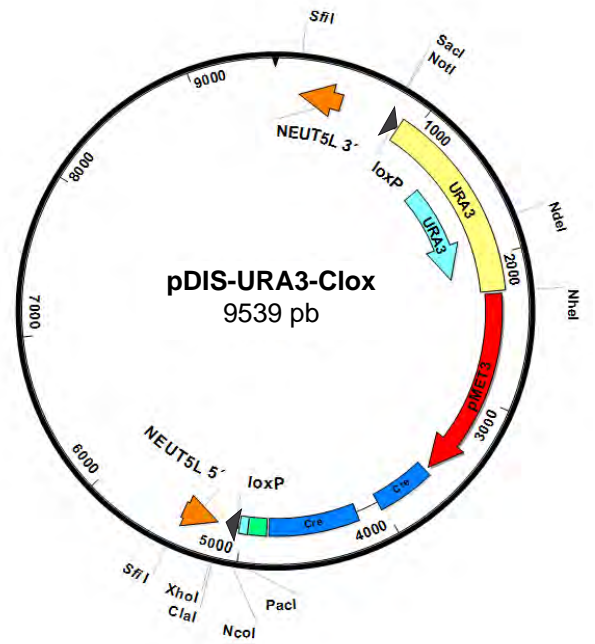

**Table A. Strains used**

| Strain                   | Genotype                                                                           | Origin                     |
|--------------------------|------------------------------------------------------------------------------------|----------------------------|
| BWP-17                   | <i>ura3Δ::imm434/ura3Δ::imm434 his1Δ::hisG/his1Δ::hisG arg4Δ::hisG/arg4Δ::hisG</i> | Enloe <i>et al.</i> , 2000 |
| OL2819                   | <i>CDC12-yEmCherry::loxP TUB2-GFPγ::loxP</i>                                       | This work                  |
| OL2835                   | <i>SEP7-HA::LAL</i>                                                                | This work                  |
| OL2837                   | <i>SEP7-HA::LAL CDC10-HA::LHL</i>                                                  | This work                  |
| OL2845                   | <i>NUP49-GFPγ::LAL/NUP49</i>                                                       | This work                  |
| OL2847                   | <i>NUP49-GFPγ::LAL/NUP49 TUB2-GFPγ::LUL/TUB2</i>                                   | This work                  |
| OL2866                   | <i>NUP49-GFPγ::loxP/NUP49 TUB2-GFPγ::loxP/TUB2 CDC12-GFPγ::loxP/CDC12</i>          | This work                  |
| OL2867                   | <i>NUP49-GFPγ::LAL/NUP49 TUB2-GFPγ::LUL/TUB2 CDC12-GFPγ::NAT1-Clox/CDC12</i>       | This work                  |
| OL2872                   | <i>sep7::LUL/SEP7</i>                                                              | This work                  |
| OL2908                   | <i>sep7::LUL/sep7::NAT1-Clox</i>                                                   | This work                  |
| OL2909                   | <i>sep7::loxP/sep7::loxP</i>                                                       | This work                  |
| <i>CDC12-GFP</i>         | <i>CDC12-GFPγ::LAL/CDC12</i>                                                       | This work                  |
| <i>CDC12-3xGFP</i>       | <i>CDC12-3xGFPγ::LAL/CDC12</i>                                                     | This work                  |
| <i>TripleHA</i>          | <i>SEP7-HA::LAL/SEP7 CDC10-HA::LHL/CDC10 CDC12-HA::NAT1-Clox/CDC12</i>             | This work                  |
| <i>TripleHA resolved</i> | <i>SEP7-HA::loxP/SEP7 CDC10-HA::loxP/CDC10 CDC12-HA::loxP/CDC12</i>                | This work                  |
